# Supplementary material
Source: PubMed Central journal article supplement (PMC2650293)
Supplement: 0811946106_0811946106SI.pdf [file 0811946106_0811946106SI.pdf]

# Supporting Information

Ding *et al.* 10.1073/pnas.0811946106

## SI Text

**Screw Dislocation Representation.** Central to our discussion is a simple theorem, establishing the relationship between the arbitrary nanotube  $(n, m)$  and its equivalent representation as a zigzag tube with a screw *dislocation* along its axis:

$\forall(n, m)$ , even  $m \Leftrightarrow (n + m/2, 0)$  with dislocation of Burgers vector  $\mathbf{b}_\gamma = m(-1/2, 1)$ .

$\forall(n, m)$ , odd  $m \Leftrightarrow (n + m/2 + 1/2, 0)$  with  $\mathbf{b}_\gamma = m(-1/2, 1)$  and an edge component  $b_\perp = -1/2$ .

Its validity can be seen by inspection of [Fig. S1A](#). In the

extreme case of an armchair tube, an example is shown in [Fig. S1B](#).

**Configurations for Energy Calculations.** To determine the kink formation energy, the self-consistent DFT calculations were performed. While some details are discussed in *Methods*, calculations involve rather specific atomic configurations, which are shown here in [Figs. S2](#) and [S3](#). Results of the additional numerical tests, also discussed in *Methods*, are presented here in [Table S1](#).



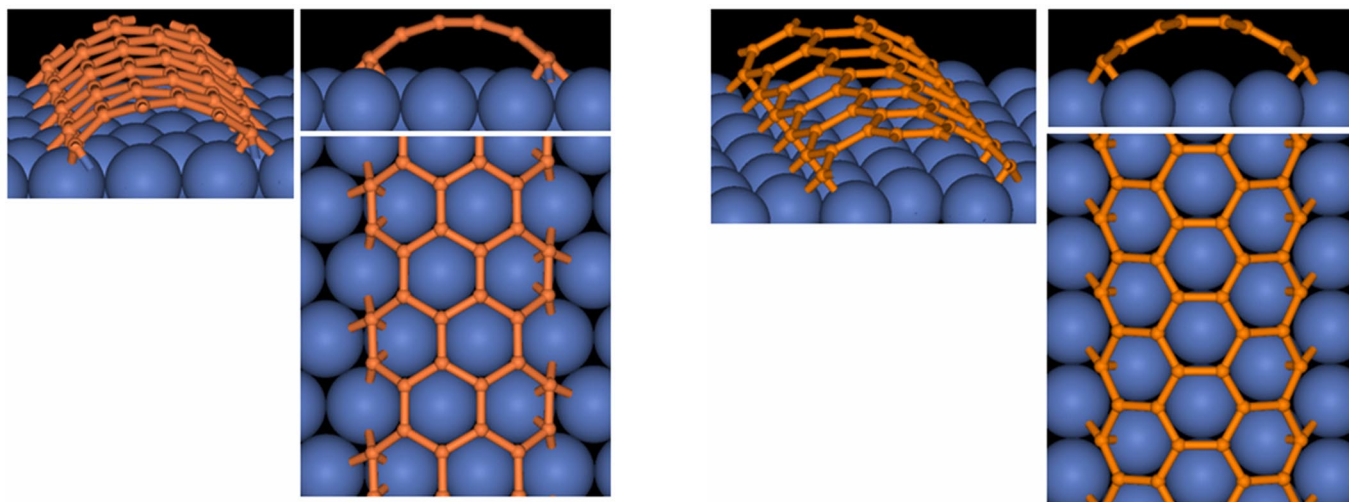

**Fig. S2.** Relaxed armchair and zigzag nanoribbon on an Ni (1, 1, 1) flat surface. (*Left*) Armchair strip/ribbon on an Ni (111) surface. (*Right*) Zigzag strip/ribbon on an Ni (111) surface.

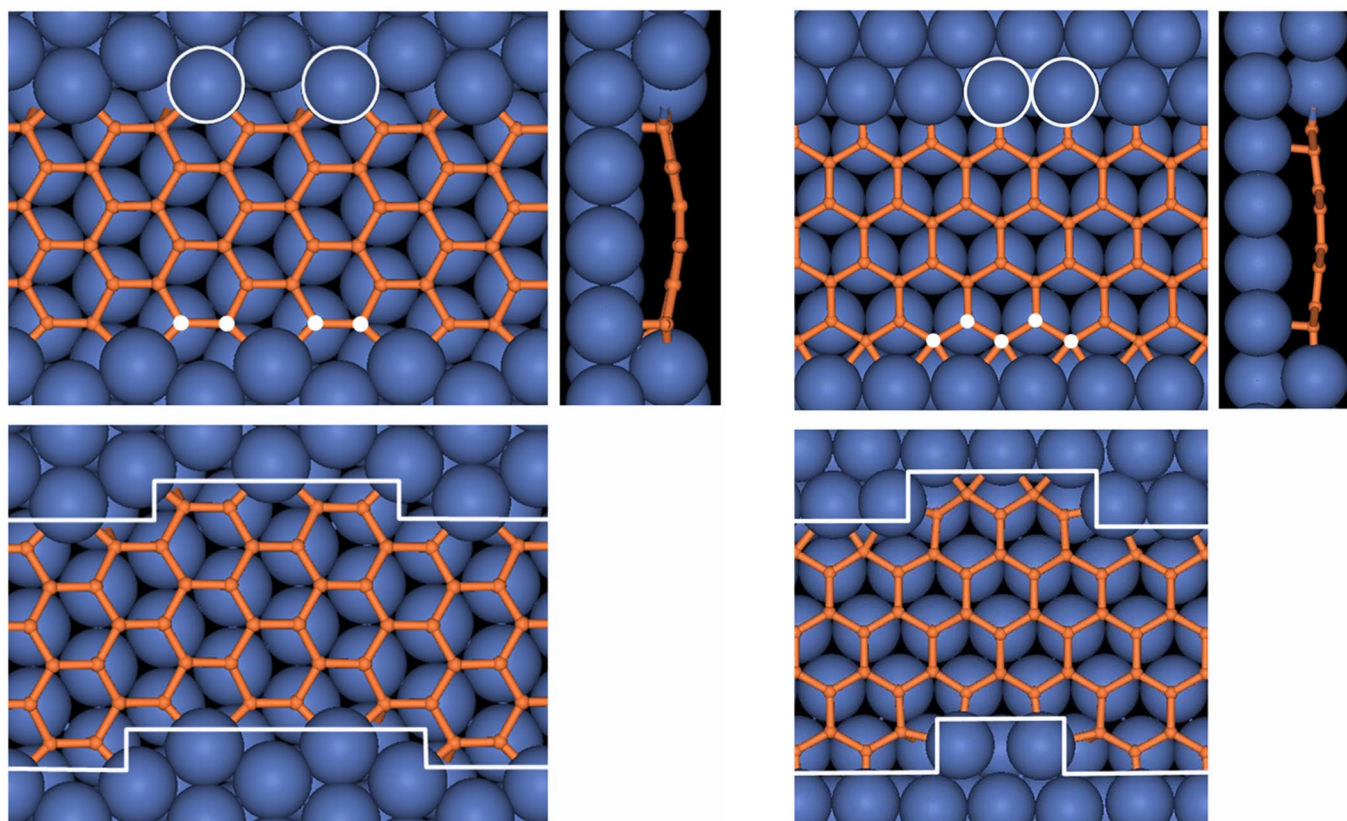

**Fig. S3.** Few C atoms (marked with white dots) are swapped with metal atoms (circled white) across the graphene strip/ribbon (*Top*), to create a quartet of kinks on the catalyst-graphene interface (*bottom*). *Left* shows the unit cell of an armchair ribbon located between the 2 metal steps and *Right* shows a unit cell for a zigzag case.

**Table S1. Calculations for the C-contact with fully relaxed double layer of Ni**

| Contact                       | Energy calculated with gamma point (eV) | Energy calculated with 2x2x1 k-points (eV) |
|-------------------------------|-----------------------------------------|--------------------------------------------|
| ZZ edge with kinks            | -845.224                                | -845.288                                   |
| ZZ edge without kinks         | -847.949                                | -847.845                                   |
| Nucleation barrier on ZZ edge | 1.36                                    | 1.28                                       |
| AC edge without kinks         | -901.697                                |                                            |
| AC edge with kinks            | -901.635                                |                                            |
| Nucleation barrier on AC edge | 0.031                                   |                                            |
